# Supplementary material for: Lipoprotein Subclasses Independently Contribute to Subclinical Variance of Microvascular and Macrovascular Health
Source: MDPI journal article supplement (doi:10.3390/molecules27154760), 2022-07-25
Supplement: s1 [file s1]

# Lipoprotein Subclasses Independently Contribute to Subclinical Variance of Microvascular and Macrovascular Health

Lukas Streese <sup>1,†</sup>, Hansjörg Habisch <sup>2,†</sup>, Arne Deiseroth <sup>1</sup>, Justin Carrard <sup>1</sup>, Denis Infanger <sup>1</sup>, Arno Schmidt-Trucksäss <sup>1</sup>, Tobias Madl <sup>2,3,\*</sup> and Henner Hanssen <sup>1,‡</sup>

<sup>1</sup> Department of Sport, Exercise and Health, Medical Faculty, University of Basel, 4052 Basel, Switzerland; lukas.streese@unibas.ch (L.S.); arne.deiseroth@unibas.ch (A.D.); justin.carrard@unibas.ch (J.C.); denis.infanger@unibas.ch (D.I.); arno.schmidt-trucksass@unibas.ch (A.S.-T.); henner.hanssen@unibas.ch (H.H.)

<sup>2</sup> Gottfried Schatz Research Center for Cell Signaling, Metabolism and Aging, Molecular Biology and Biochemistry, Medical University of Graz, 8010 Graz, Austria; hansjoerg.habisch@medunigraz.at

<sup>3</sup> BioTechMed Graz, 8010 Graz, Austria

\* Correspondence: tobias.madl@medunigraz.at; Tel.: +43-316-385-71972

† These authors contributed equally to this work as shared first authorship.

‡ These authors contributed equally to this work as shared senior authorship.

**Table S1.** Sample characteristics of 84 patients with at least two cardiovascular risk factors.

| Patients' characteristics            | Risk Cohort<br>Mean±SD |
|--------------------------------------|------------------------|
| Sex (f/m)                            | 42/42                  |
| Age (years)                          | 59±6                   |
| Height (cm)                          | 169±8                  |
| Body mass (kg)                       | 94.7±14.0              |
| Body mass index (kg/m <sup>2</sup> ) | 33.2±4.1               |
| Waist circumference (cm)             | 112±11                 |
| Fat mass (%)                         | 40.1±8.2               |
| Muscle mass (kg)                     | 31.6±6.9               |
| 24h systolic BP (mmHg)               | 130±11                 |
| 24h diastolic BP (mmHg)              | 81±8                   |
| Fasting glucose (mmol/l)             | 5.8±1.8                |
| Triglycerides (mmol/l)               | 1.8±1.1                |
| HDL-C (mmol/l)                       | 1.3±0.3                |
| LDL-C (mmol/l)                       | 3.2±0.8                |
| Hs-CRP (mg/l)                        | 3.6±4.1                |
| PROCAM score                         | 42±10                  |
| PROCAM 10 years risk (%)             | 9.5±7.3                |
| VO <sub>2</sub> peak (ml/min/kg)     | 26±4                   |
| CRAE (μm)                            | 171±14                 |
| CRVE (μm)                            | 218±16                 |
| AVR                                  | 0.79±0.05              |
| PWV (m/s)                            | 8.3±1.5                |

Abbreviations: BP, blood pressure; HDL-C, high-density lipoprotein cholesterol; LDL-C, low-density lipoprotein cholesterol; Hs-CRP, high-sensitive C-reactive protein; VO<sub>2</sub>peak, peak oxygen uptake; CRAE, central retinal arteriolar equivalent; CRVE, central retinal venular equivalent; AVR, arteriolar-to-venular diameter ratio; PWV, pulse wave velocity; SD, standard deviation.

**Table S2.** A list of all 112 lipoprotein-related parameters measured by NMR spectroscopy.

| All analytes and 95% confidence intervals for the model of the IVDr Lipoprotein Subclass Analysis (B.I.LISA™) method of Bruker. |        |                                       |           |   |           | Quantiles measured in this study cohort |      |       |
|---------------------------------------------------------------------------------------------------------------------------------|--------|---------------------------------------|-----------|---|-----------|-----------------------------------------|------|-------|
| analyte                                                                                                                         | unit   | name                                  | range min | - | range max | 2.5%                                    | 50%  | 97.5% |
| TPTG                                                                                                                            | mg/dL  | total triglycerides                   | 53        | - | 490       | 53                                      | 113  | 460   |
| TPCH                                                                                                                            | mg/dL  | total cholesterol                     | 140       | - | 341       | 151                                     | 233  | 327   |
| LDCH                                                                                                                            | mg/dL  | LDL cholesterol                       | 55        | - | 227       | 72                                      | 135  | 202   |
| HDCH                                                                                                                            | mg/dL  | HDL cholesterol                       | 35        | - | 96        | 36                                      | 61   | 96    |
| TPA1                                                                                                                            | mg/dL  | total Apo-A1                          | 112       | - | 217       | 117                                     | 165  | 219   |
| TPA2                                                                                                                            | mg/dL  | total Apo-A2                          | 24        | - | 48        | 29                                      | 38   | 51    |
| TPAB                                                                                                                            | mg/dL  | total Apo-B100                        | 48        | - | 160       | 64                                      | 105  | 155   |
| LDHD                                                                                                                            | -/-    | LDL-cholesterol/HDL-cholesterol ratio | 0.98      | - | 4.08      | 1.0                                     | 2.2  | 3.9   |
| ABA1                                                                                                                            | -/-    | Apo-B100/Apo-A1 ratio                 | 0.3       | - | 1.07      | 0.4                                     | 0.6  | 1.1   |
| TBPN                                                                                                                            | nmol/L | total particle number                 | 876       | - | 2908      | 1170                                    | 1902 | 2812  |
| VLPN                                                                                                                            | nmol/L | VLDL particle number                  | 50        | - | 473       | 46                                      | 153  | 490   |
| IDPN                                                                                                                            | nmol/L | IDL particle number                   | 36        | - | 316       | 36                                      | 99   | 221   |
| LDPN                                                                                                                            | nmol/L | LDL particle number                   | 760       | - | 2560      | 926                                     | 1602 | 2272  |
| L1PN                                                                                                                            | nmol/L | LDL-1 particle number                 | 98        | - | 567       | 89                                      | 210  | 375   |
| L2PN                                                                                                                            | nmol/L | LDL-2 particle number                 | 47        | - | 427       | 21                                      | 148  | 285   |
| L3PN                                                                                                                            | nmol/L | LDL-3 particle number                 | 51        | - | 499       | 22                                      | 188  | 334   |
| L4PN                                                                                                                            | nmol/L | LDL-4 particle number                 | 77        | - | 577       | 48                                      | 249  | 419   |
| L5PN                                                                                                                            | nmol/L | LDL-5 particle number                 | 86        | - | 615       | 158                                     | 345  | 584   |
| L6PN                                                                                                                            | nmol/L | LDL-6 particle number                 | 91        | - | 815       | 308                                     | 461  | 972   |
| VLTG                                                                                                                            | mg/dL  | VLDL triglycerides                    | 21        | - | 336       | 34                                      | 85   | 330   |
| IDTG                                                                                                                            | mg/dL  | IDL triglycerides                     | 5         | - | 100       | 1.6                                     | 10   | 68    |
| LDTG                                                                                                                            | mg/dL  | LDL triglycerides                     | 12        | - | 45        | 12.3                                    | 20   | 41    |
| HDTG                                                                                                                            | mg/dL  | HDL triglycerides                     | 7         | - | 29        | 6.7                                     | 12   | 20    |
| VLCH                                                                                                                            | mg/dL  | VLDL cholesterol                      | 5         | - | 77        | 3.9                                     | 19   | 67    |
| IDCH                                                                                                                            | mg/dL  | IDL cholesterol                       | 4         | - | 50        | 3.1                                     | 14   | 39    |
| VLFC                                                                                                                            | mg/dL  | VLDL free cholesterol                 | 3         | - | 33        | 3.0                                     | 10   | 32    |
| IDFC                                                                                                                            | mg/dL  | IDL free cholesterol                  | 1         | - | 14        | 0.9                                     | 4.0  | 11    |
| LDFC                                                                                                                            | mg/dL  | LDL free cholesterol                  | 17        | - | 63        | 21                                      | 39   | 56    |
| HDFC                                                                                                                            | mg/dL  | HDL free cholesterol                  | 7         | - | 27        | 6.2                                     | 14   | 23    |
| VLPL                                                                                                                            | mg/dL  | VLDL phospholipids                    | 6         | - | 68        | 6.9                                     | 22   | 72    |
| IDPL                                                                                                                            | mg/dL  | IDL phospholipids                     | 3         | - | 33        | 3.3                                     | 8.2  | 26    |
| LDPL                                                                                                                            | mg/dL  | LDL phospholipids                     | 37        | - | 121       | 45                                      | 73   | 105   |
| HDPL                                                                                                                            | mg/dL  | HDL phospholipids                     | 57        | - | 136       | 52                                      | 81   | 123   |
| HDA1                                                                                                                            | mg/dL  | HDL Apo-A1                            | 110       | - | 222       | 115                                     | 164  | 223   |
| HDA2                                                                                                                            | mg/dL  | HDL Apo-A2                            | 25        | - | 48        | 31                                      | 39   | 51    |
| VLAB                                                                                                                            | mg/dL  | VLDL Apo-B100                         | 3         | - | 26        | 2.6                                     | 8.4  | 27    |
| IDAB                                                                                                                            | mg/dL  | IDL Apo-B100                          | 2         | - | 17        | 2.0                                     | 5.5  | 12    |
| LDAB                                                                                                                            | mg/dL  | LDL Apo-B100                          | 42        | - | 141       | 51                                      | 88   | 125   |
| V1TG                                                                                                                            | mg/dL  | VLDL-1 triglycerides                  | 6         | - | 212       | 16                                      | 45   | 177   |
| V2TG                                                                                                                            | mg/dL  | VLDL-2 triglycerides                  | 3         | - | 67        | 1.5                                     | 11   | 60    |
| V3TG                                                                                                                            | mg/dL  | VLDL-3 triglycerides                  | 2         | - | 49        | 1.2                                     | 10   | 47    |
| V4TG                                                                                                                            | mg/dL  | VLDL-4 triglycerides                  | 3         | - | 28        | 2.7                                     | 9.3  | 24    |
| V5TG                                                                                                                            | mg/dL  | VLDL-5 triglycerides                  | 1         | - | 7         | 1.5                                     | 2.9  | 4.9   |
| V1CH                                                                                                                            | mg/dL  | VLDL-1 cholesterol                    | 1         | - | 35        | 1.3                                     | 5.8  | 29    |
| V2CH                                                                                                                            | mg/dL  | VLDL-2 cholesterol                    | 0         | - | 15        | 0.2                                     | 2.3  | 13    |
| analyte                                                                                                                         | unit   | name                                  | range min | - | range max | 2.5%                                    | 50%  | 97.5% |

| V3CH    | mg/dL | VLDL-3 cholesterol      | 0         | - | 16        | 0.4  | 3.5 | 14    |
|---------|-------|-------------------------|-----------|---|-----------|------|-----|-------|
| V4CH    | mg/dL | VLDL-4 cholesterol      | 1         | - | 15        | 1.5  | 5.7 | 15    |
| V5CH    | mg/dL | VLDL-5 cholesterol      | 0         | - | 4         | 0.2  | 1.5 | 3.0   |
| V1FC    | mg/dL | VLDL-1 free cholesterol | 0         | - | 13        | 0.0  | 2.3 | 12    |
| V2FC    | mg/dL | VLDL-2 free cholesterol | 0         | - | 7         | 0.0  | 0.8 | 6.2   |
| V3FC    | mg/dL | VLDL-3 free cholesterol | 0         | - | 8         | 0.1  | 1.4 | 7.3   |
| V4FC    | mg/dL | VLDL-4 free cholesterol | 0         | - | 7         | 0.4  | 2.3 | 6.0   |
| V5FC    | mg/dL | VLDL-5 free cholesterol | 0         | - | 2         | 0.0  | 0.4 | 1.5   |
| V1PL    | mg/dL | VLDL-1 phospholipids    | 1         | - | 32        | 2.0  | 6.8 | 28    |
| V2PL    | mg/dL | VLDL-2 phospholipids    | 1         | - | 15        | 0.5  | 2.9 | 13    |
| V3PL    | mg/dL | VLDL-3 phospholipids    | 1         | - | 14        | 0.5  | 3.6 | 14    |
| V4PL    | mg/dL | VLDL-4 phospholipids    | 2         | - | 13        | 1.6  | 4.9 | 11    |
| V5PL    | mg/dL | VLDL-5 phospholipids    | 0         | - | 5         | 0.4  | 1.8 | 3.5   |
| L1TG    | mg/dL | LDL-1 triglycerides     | 3         | - | 14        | 1.3  | 4.5 | 13    |
| L2TG    | mg/dL | LDL-2 triglycerides     | 1         | - | 6         | 0.4  | 1.6 | 3.4   |
| L3TG    | mg/dL | LDL-3 triglycerides     | 1         | - | 6         | 1.2  | 2.6 | 4.4   |
| L4TG    | mg/dL | LDL-4 triglycerides     | 1         | - | 8         | 0.8  | 2.7 | 5.5   |
| L5TG    | mg/dL | LDL-5 triglycerides     | 1         | - | 9         | 1.3  | 3.3 | 7.0   |
| L6TG    | mg/dL | LDL-2 triglycerides     | 1         | - | 13        | 2.4  | 4.5 | 11    |
| L1CH    | mg/dL | LDL-1 cholesterol       | 8         | - | 59        | 7.6  | 22  | 41    |
| L2CH    | mg/dL | LDL-2 cholesterol       | 2         | - | 48        | 0.0  | 14  | 31    |
| L3CH    | mg/dL | LDL-3 cholesterol       | 3         | - | 46        | 0.0  | 18  | 32    |
| L4CH    | mg/dL | LDL-4 cholesterol       | 4         | - | 49        | 0.7  | 22  | 37    |
| L5CH    | mg/dL | LDL-5 cholesterol       | 5         | - | 49        | 12   | 27  | 47    |
| L6CH    | mg/dL | LDL-6 cholesterol       | 6         | - | 54        | 21   | 32  | 59    |
| L1FC    | mg/dL | LDL-1 free cholesterol  | 2         | - | 17        | 2.8  | 6.9 | 12    |
| L2FC    | mg/dL | LDL-2 free cholesterol  | 1         | - | 14        | 0.4  | 4.7 | 10    |
| L3FC    | mg/dL | LDL-3 free cholesterol  | 1         | - | 13        | 1.0  | 5.6 | 10    |
| L4FC    | mg/dL | LDL-4 free cholesterol  | 1         | - | 12        | 1.6  | 6.5 | 10    |
| L5FC    | mg/dL | LDL-5 free cholesterol  | 2         | - | 13        | 4.1  | 7.3 | 12    |
| L6FC    | mg/dL | LDL-6 free cholesterol  | 2         | - | 12        | 5.4  | 8.8 | 15    |
| L1PL    | mg/dL | LDL-1 phospholipids     | 6         | - | 30        | 5.2  | 12  | 22    |
| L2PL    | mg/dL | LDL-2 phospholipids     | 2         | - | 25        | 0.4  | 8.0 | 16    |
| L3PL    | mg/dL | LDL-3 phospholipids     | 2         | - | 24        | 1.1  | 10  | 17    |
| L4PL    | mg/dL | LDL-4 phospholipids     | 3         | - | 25        | 1.7  | 12  | 19    |
| L5PL    | mg/dL | LDL-5 phospholipids     | 4         | - | 25        | 6.5  | 14  | 24    |
| L6PL    | mg/dL | LDL-6 phospholipids     | 4         | - | 28        | 12   | 17  | 31    |
| L1AB    | mg/dL | LDL-1 Apo-B100          | 5         | - | 31        | 4.9  | 12  | 21    |
| L2AB    | mg/dL | LDL-2 Apo-B100          | 3         | - | 23        | 1.1  | 8.1 | 16    |
| L3AB    | mg/dL | LDL-3 Apo-B100          | 3         | - | 27        | 1.2  | 10  | 18    |
| L4AB    | mg/dL | LDL-4 Apo-B100          | 4         | - | 32        | 2.6  | 14  | 23    |
| L5AB    | mg/dL | LDL-5 Apo-B100          | 5         | - | 34        | 8.7  | 19  | 32    |
| L6AB    | mg/dL | LDL-6 Apo-B100          | 5         | - | 45        | 17   | 25  | 53    |
| H1TG    | mg/dL | HDL-1 triglycerides     | 1         | - | 12        | 1.3  | 3.2 | 6.8   |
| H2TG    | mg/dL | HDL-2 triglycerides     | 1         | - | 5         | 0.9  | 1.7 | 2.9   |
| H3TG    | mg/dL | HDL-3 triglycerides     | 1         | - | 5         | 1.1  | 2.2 | 4.3   |
| H4TG    | mg/dL | HDL-4 triglycerides     | 2         | - | 8         | 1.7  | 4.0 | 7.5   |
| H1CH    | mg/dL | HDL-1 cholesterol       | 6         | - | 46        | 5.2  | 15  | 42    |
| H2CH    | mg/dL | HDL-2 cholesterol       | 4         | - | 16        | 3.7  | 8.4 | 14    |
| H3CH    | mg/dL | HDL-3 cholesterol       | 7         | - | 19        | 6.5  | 11  | 16    |
| analyte | unit  | name                    | range min | - | range max | 2.5% | 50% | 97.5% |

---

|      |       |                        |    |   |     |     |     |     |
|------|-------|------------------------|----|---|-----|-----|-----|-----|
| H4CH | mg/dL | HDL-4 cholesterol      | 11 | - | 30  | 18  | 25  | 33  |
| H1FC | mg/dL | HDL-1 free cholesterol | 1  | - | 12  | 1.4 | 4.3 | 11  |
| H2FC | mg/dL | HDL-2 free cholesterol | 1  | - | 5   | 0.9 | 2.3 | 3.7 |
| H3FC | mg/dL | HDL-3 free cholesterol | 1  | - | 5   | 1.4 | 2.8 | 4.3 |
| H4FC | mg/dL | HDL-4 free cholesterol | 2  | - | 9   | 3.3 | 5.3 | 7.6 |
| H1PL | mg/dL | HDL-1 phospholipids    | 8  | - | 57  | 6.4 | 17  | 50  |
| H2PL | mg/dL | HDL-2 phospholipids    | 7  | - | 27  | 6.1 | 13  | 23  |
| H3PL | mg/dL | HDL-3 phospholipids    | 12 | - | 32  | 10  | 18  | 26  |
| H4PL | mg/dL | HDL-4 phospholipids    | 20 | - | 44  | 24  | 32  | 45  |
| H1A1 | mg/dL | HDL-1 Apo-A1           | 6  | - | 75  | 6.2 | 21  | 68  |
| H2A1 | mg/dL | HDL-2 Apo-A1           | 10 | - | 36  | 12  | 20  | 31  |
| H3A1 | mg/dL | HDL-3 Apo-A1           | 18 | - | 47  | 18  | 29  | 41  |
| H4A1 | mg/dL | HDL-4 Apo-A1           | 56 | - | 110 | 68  | 91  | 119 |
| H1A2 | mg/dL | HDL-1 Apo-A2           | 1  | - | 8   | 0.7 | 2.4 | 6.4 |
| H2A2 | mg/dL | HDL-2 Apo-A2           | 2  | - | 8   | 1.8 | 3.7 | 5.9 |
| H3A2 | mg/dL | HDL-3 Apo-A2           | 5  | - | 12  | 4.6 | 7.1 | 11  |
| H4A2 | mg/dL | HDL-4 Apo-A2           | 12 | - | 30  | 17  | 25  | 34  |

---
